# Supplementary material
Source: PubMed Central journal article supplement (PMC6754798)
Supplement: NIHMS1533190-supplement-1.pdf [file NIHMS1533190-supplement-1.pdf]

**Noradrenergic dysfunction accelerates LPS-elicited inflammation-related ascending sequential neurodegeneration and deficits in non-motor/motor functions**

Sheng Song<sup>1,4</sup>, Qingshan Wang<sup>1,2</sup>, Lulu Jiang<sup>1,3</sup>, Esteban Oyarzabal<sup>1,4</sup>, Natallia V. Riddick<sup>5</sup>, Belinda Wilson<sup>1</sup>, Sheryl S. Moy<sup>5</sup>, Yen-Yu Ian Shih<sup>4</sup>, Jau-Shyong Hong<sup>1</sup>

1 Neuropharmacology Section, Neurobiology Laboratory, National Institute of Environmental Health Sciences, National Institutes of Health, Research Triangle Park, North Carolina, USA.

2 Department of Toxicology, School of Public Health, Dalian Medical University, Dalian, Liaoning, China.

3 Institute of Toxicology, School of Public Health, Shandong University, Jinan, Shandong, China.

4 Biomedical Research Imaging Center, University of North Carolina at Chapel Hill, Chapel Hill, NC, USA.

5 Department of Psychiatry and Carolina Institute for Developmental Disabilities, University of North Carolina School of Medicine, Chapel Hill, NC 27599, USA.

Correspondence to:

Jau-Shyong Hong, Ph.D. E-mail: hong3@niehs.nih.gov

P.O. Box 12233

Mail Drop F1-01

Research Triangle Park, North Carolina 27709

USA

## Supplementary Materials

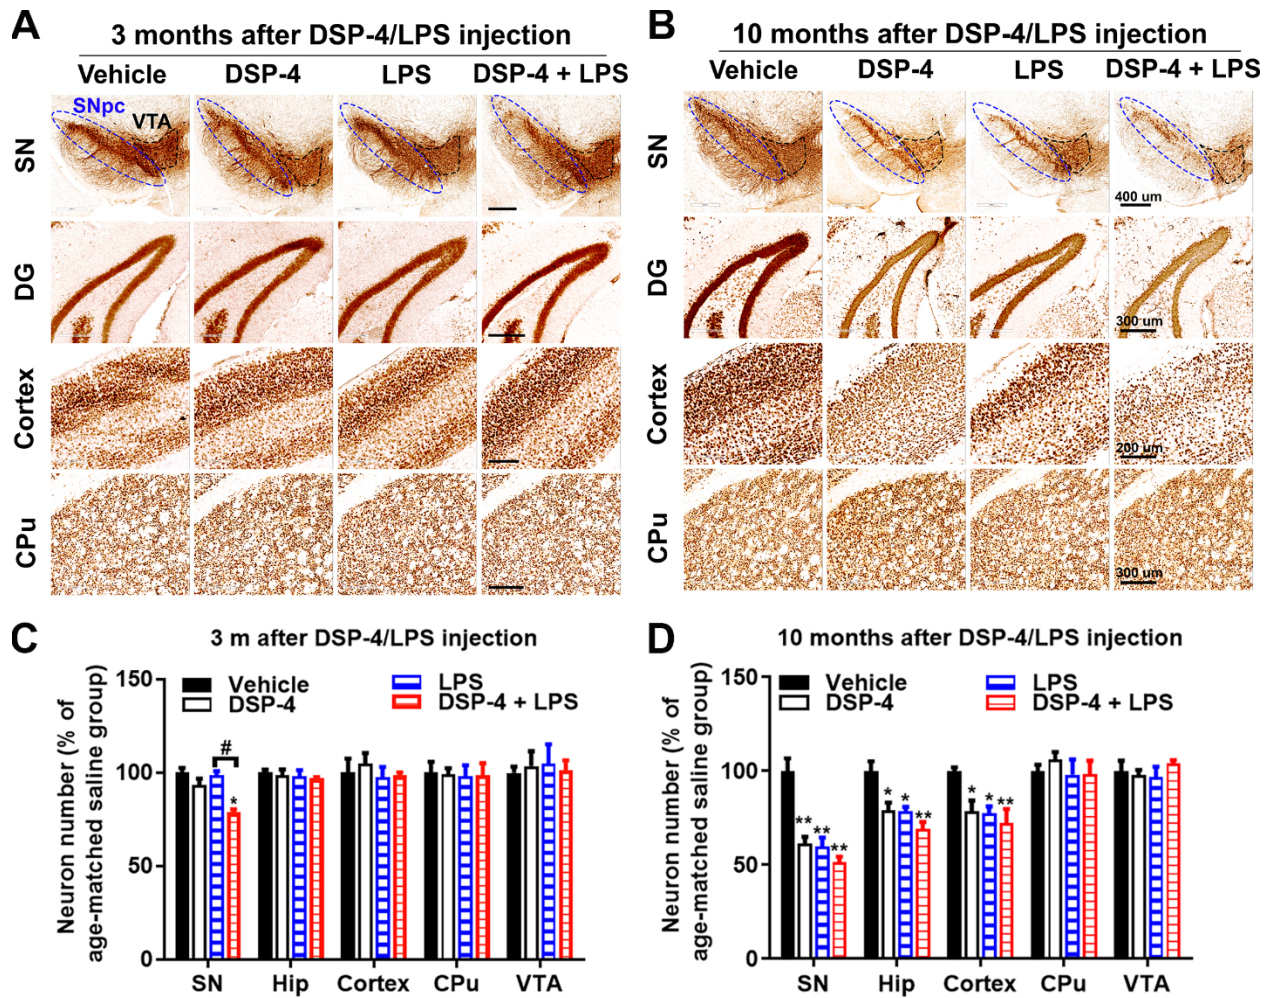

**Supplementary Fig. 1.** Representative images of staining in SN, hippocampus, cortex, and striatum at 3 (A) and 10 (B) months after DSP-4/LPS injection. Dopaminergic neurons in the SNpc were stained with anti-TH antibody. Neurons in hippocampal granule layer, cortex and striatum were stained with anti-Neu-N antibody. Scales as indicated in the pictures. (C, D) Quantitative analysis of neuron loss in the different brain regions at 3 (C) and 10 (D) months after DSP-4/LPS injection. Results are expressed as a percentage of age-matched vehicle controls (mean  $\pm$  SEM) from 3-5 mice in each group at each time point. \* $p$ <0.05 and \*\* $p$ <0.01 compare with time-matched saline controls, # $p$ <0.05 compare with indicated group.

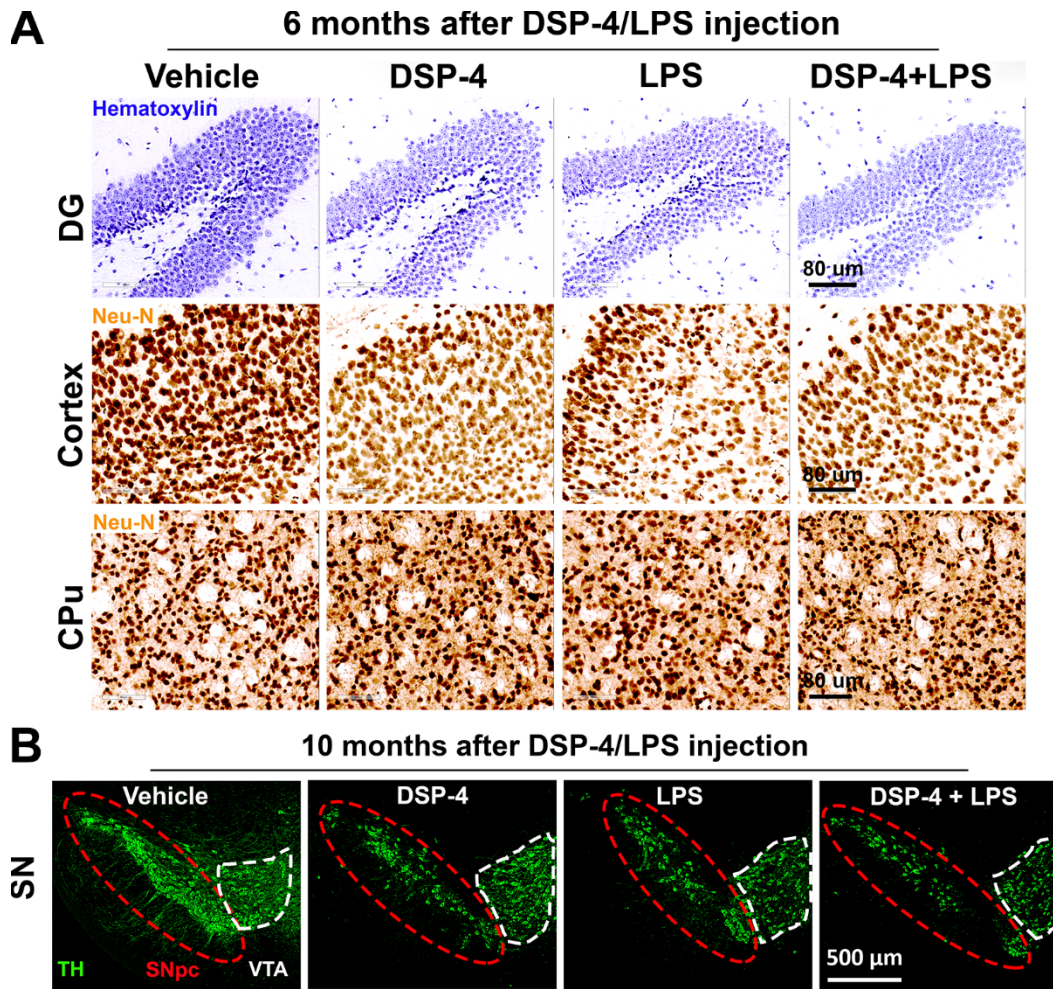

**Supplementary Fig. 2.** (A) High-power images show the changes of neuron number in hippocampus, cortex, and striatum at 6 months after injection. Neurons in hippocampal granule layer were labeled with hematoxylin; Neurons in cortex and striatum were stained with anti-Neu-N antibody. (B) High quality immunofluorescent images show the loss of TH<sup>+</sup> cell in SNpc rather than in VTA at 10 months after DSP-4/LPS injection. Scales as indicated in the pictures.

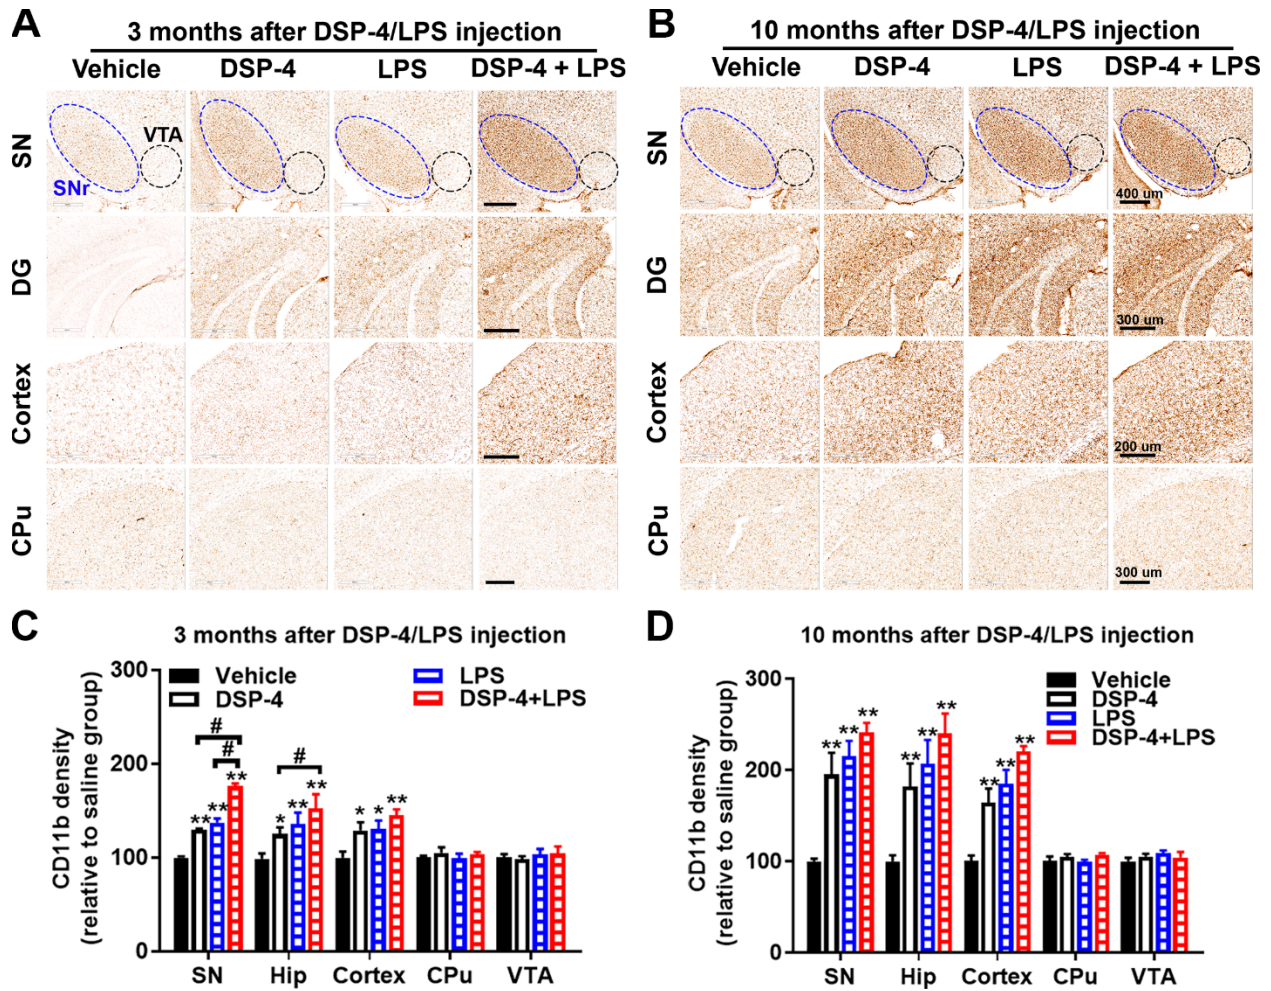

**Supplementary Fig. 3.** Representative images of CD11b staining in SN, VTA, hippocampus, cortex, and striatum at 3 (A) and 10 (B) months after DSP-4/LPS injection. Scales as indicated in the pictures. (C-D) Quantitative analysis of microglial activation in the different brain regions by measuring alterations of CD11b density at 3 (C) and 10 (D) months after DSP-4/LPS injection. Results are expressed as a percentage of age-matched vehicle controls (mean  $\pm$  SEM) from 3-5 mice in each group at each time point. \* $p$ <0.05 and \*\* $p$ <0.01 compare with age-matched vehicle controls, # $p$ <0.05 compare with indicated group.

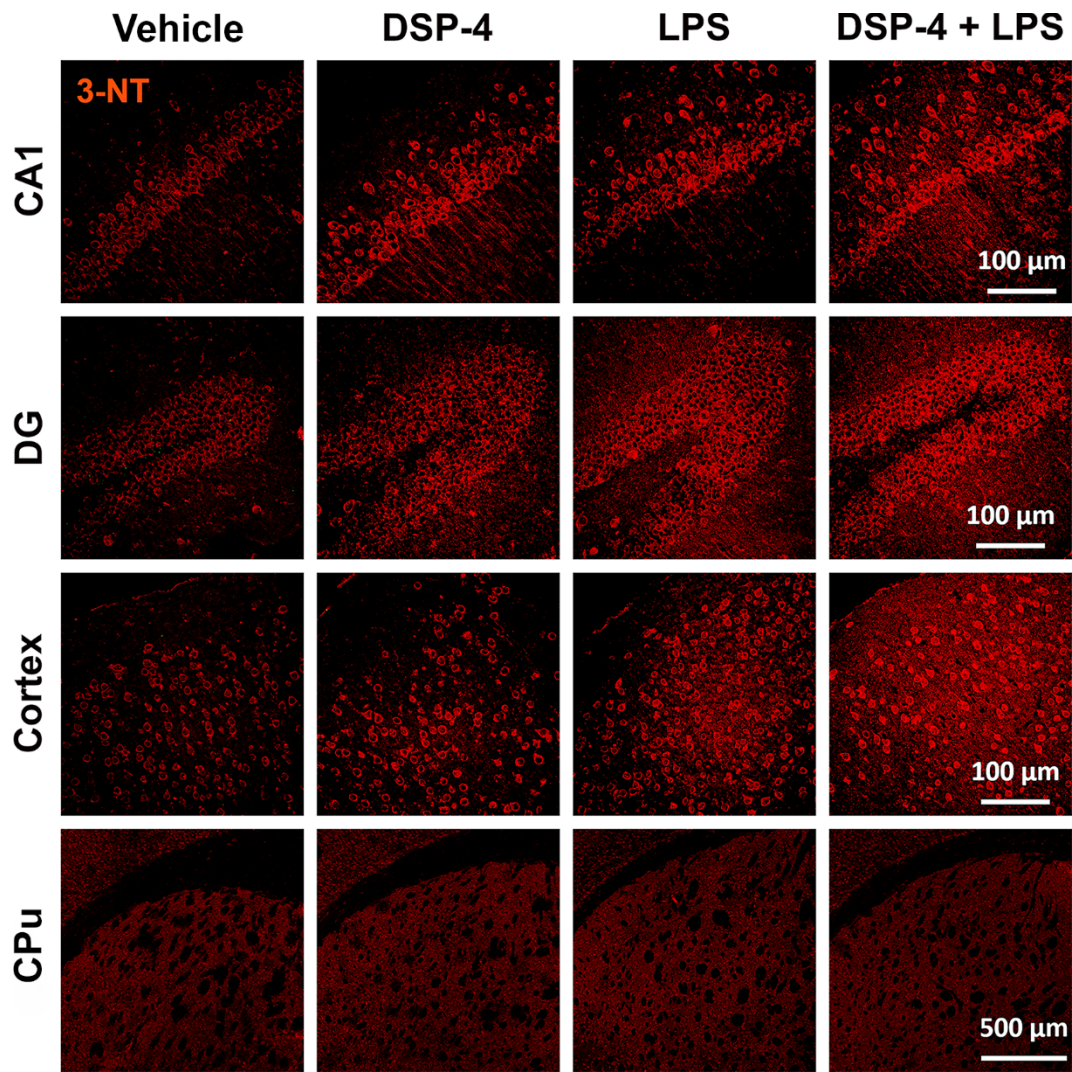

**Supplementary Fig. 4.** Representative images show the increased oxidative stress (3-NT, red) in all those LC-innervated regions, including CA1, DG, and cortex after 6 months of DSP-4/LPS injection. Scales as indicated in the pictures.

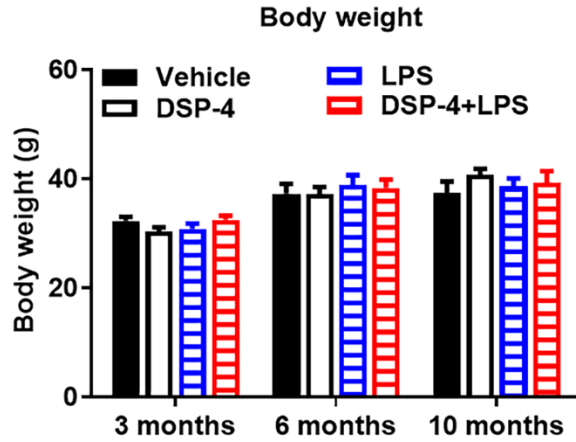

**Supplementary Fig. 5.** There were no differences in body weight between treated groups vs. controls during these studies.

**Supplementary Table 1.** Lack of treatment effects on vision and swimming ability in the Morris water maze. Data are means ( $\pm$  SEM) of 4 trials per day.

|                                             | Vehicle      | DSP-4        | LPS          | DSP-4+LPS    |
|---------------------------------------------|--------------|--------------|--------------|--------------|
| <b>Visible platform, escape latency (s)</b> |              |              |              |              |
| Day 1                                       | 22 $\pm$ 4   | 25 $\pm$ 4   | 23 $\pm$ 4   | 26 $\pm$ 4   |
| Day 2                                       | 8 $\pm$ 2    | 9 $\pm$ 2    | 15 $\pm$ 3   | 7 $\pm$ 1    |
| <b>Swim speed (cm/s)</b>                    |              |              |              |              |
| Day 1 of visible platform test              | 18 $\pm$ 0.3 | 19 $\pm$ 0.8 | 19 $\pm$ 0.5 | 18 $\pm$ 1.1 |
| Day 1 of acquisition                        | 20 $\pm$ 0.8 | 21 $\pm$ 0.5 | 20 $\pm$ 0.3 | 18 $\pm$ 0.9 |
| Day 1 of reversal learning                  | 18 $\pm$ 1.2 | 18 $\pm$ 1.2 | 18 $\pm$ 1.3 | 17 $\pm$ 1.3 |
